# Supplementary material
Source: HighWire-hosted journal article supplement (https://www.ajnr.org/highwire/filestream/52714/field_highwire_adjunct_files/0/15-00295.pdf)
Supplement: 15-00295.pdf [file 15-00295.pdf]

**On-line Table: Acquisition parameters for MR imaging sequences**

| Parameters                 | PD-FSE          | T2-FSE          |
|----------------------------|-----------------|-----------------|
| Plane                      | Sagittal        | Sagittal        |
| FOV (mm)                   | 220             | 210             |
| Acquisition matrix         | 384 × 384       | 448 × 448       |
| Section thickness (mm)     | 3               | 3               |
| No. of sections            | 12              | 12              |
| Voxel size (mm)            | 0.8 × 0.6 × 3.0 | 0.7 × 0.5 × 3.0 |
| TR (ms)                    | 2500            | 3130            |
| TE (ms)                    | 31              | 96              |
| Signal averages            | 2               | 4               |
| Echo spacing (ms)          | 10.4            | 12              |
| Turbo factor               | 8               | 20              |
| Acquisition time (min:sec) | 2:54            | 3:25            |
